# Supplementary material for: Direct conversion of chitosan to 5-hydroxymethylfurfural in water using Brønsted–Lewis acidic ionic liquids as catalysts
Source: Royal Society of Chemistry journal article supplement (doi:10.1039/c6ra21289a), 2016-01-01
Supplement: c6ra21289a1.pdf [file c6ra21289a1.pdf]

## Supporting Information

### Direct conversion of chitosan to 5-hydroxymethylfurfural in water using Brønsted-Lewis acidic ionic liquids as catalysts

#### Contents

**Fig S1.**  $^1\text{H}$  NMR spectrum of [Hmim][HSO<sub>4</sub>] in D<sub>2</sub>O.

**Fig S2.**  $^1\text{H}$  NMR spectrum of [Hmim][HSO<sub>4</sub>]-NiCl in D<sub>2</sub>O.

**Fig S3.**  $^1\text{H}$  NMR spectrum of [Hmim][Cl] in D<sub>2</sub>O.

**Fig S4.**  $^1\text{H}$  NMR spectrum of [HSO<sub>3</sub>-b-N-(C<sub>2</sub>H<sub>5</sub>)<sub>3</sub>][Cl] in D<sub>2</sub>O.

**Fig S5.**  $^1\text{H}$  NMR spectrum of [HSO<sub>3</sub>-b-N-(C<sub>2</sub>H<sub>5</sub>)<sub>3</sub>][Cl]-ZnCl in D<sub>2</sub>O.

**Fig S6.** FT-IR spectra of samples using pyridine as probe.

**Fig S7.** FT-IR spectra of samples using acetonitrile as probe.

**Fig S8.** TGA curves of Brønsted-Lewis acidic ionic liquid.

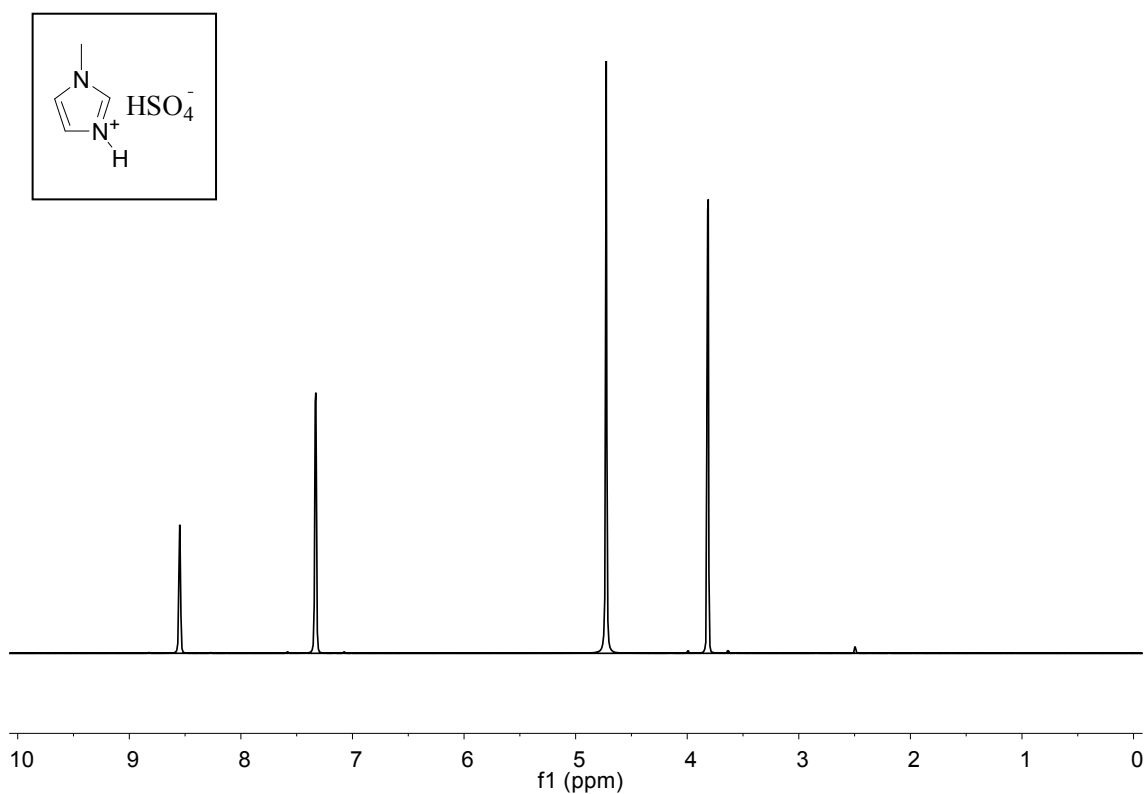

**Fig S1.** <sup>1</sup>H NMR (400 MHz, D<sub>2</sub>O) spectrum of [Hmim][HSO<sub>4</sub>]:  $\delta$  8.55 (s, 1H, imidazolyl-H), 7.33 (s, 2H, imidazolyl-H), 3.82 (s, 3H, CH<sub>3</sub>).

Anal. Calcd. for C<sub>4</sub>H<sub>8</sub>O<sub>4</sub>N<sub>2</sub>S: C 26.66; H 4.48; N 15.55; S 17.80; Found: C 26.63; H 4.50; N 15.51; S 17.84.

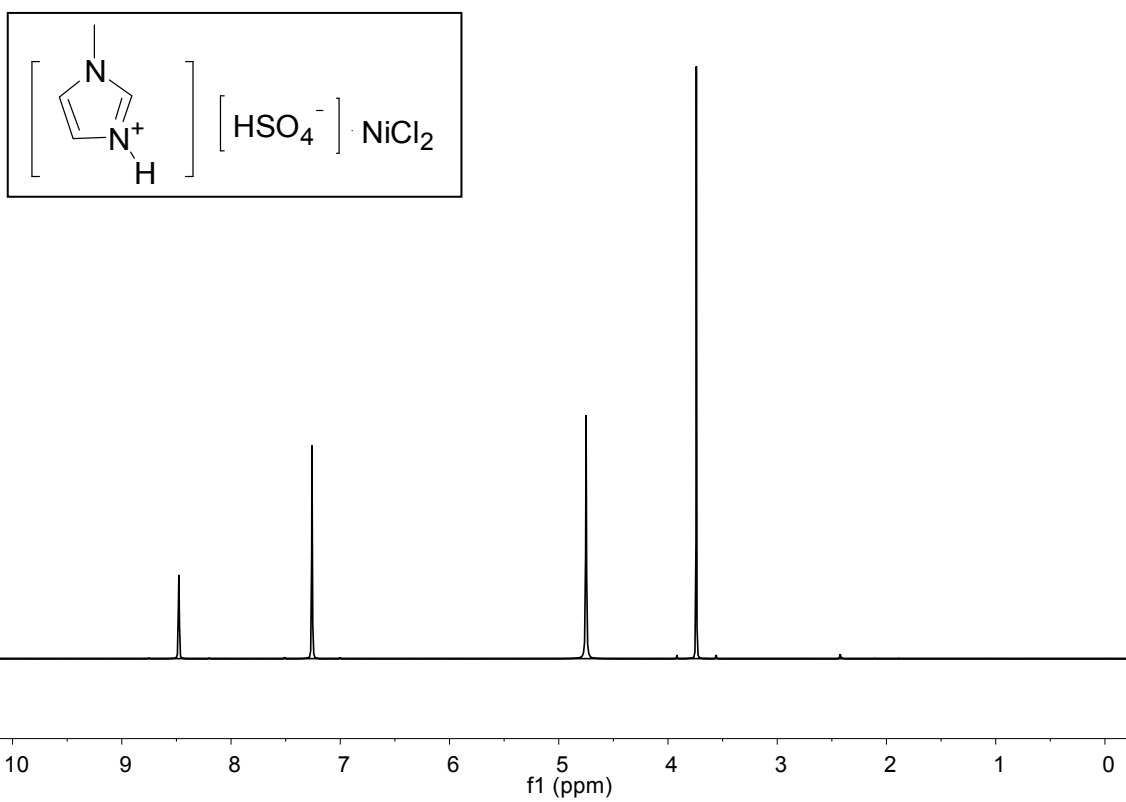

**Fig S2.**  $^1\text{H}$  NMR (400 MHz,  $\text{D}_2\text{O}$ ) spectrum of  $[\text{Hmim}][\text{HSO}_4]\cdot\text{NiCl}_2$ :  $\delta$  8.48 (s, 1H, imidazolyl-H), 7.26 (s, 2H, imidazolyl-H), 3.74 (s, 3H,  $\text{CH}_3$ )

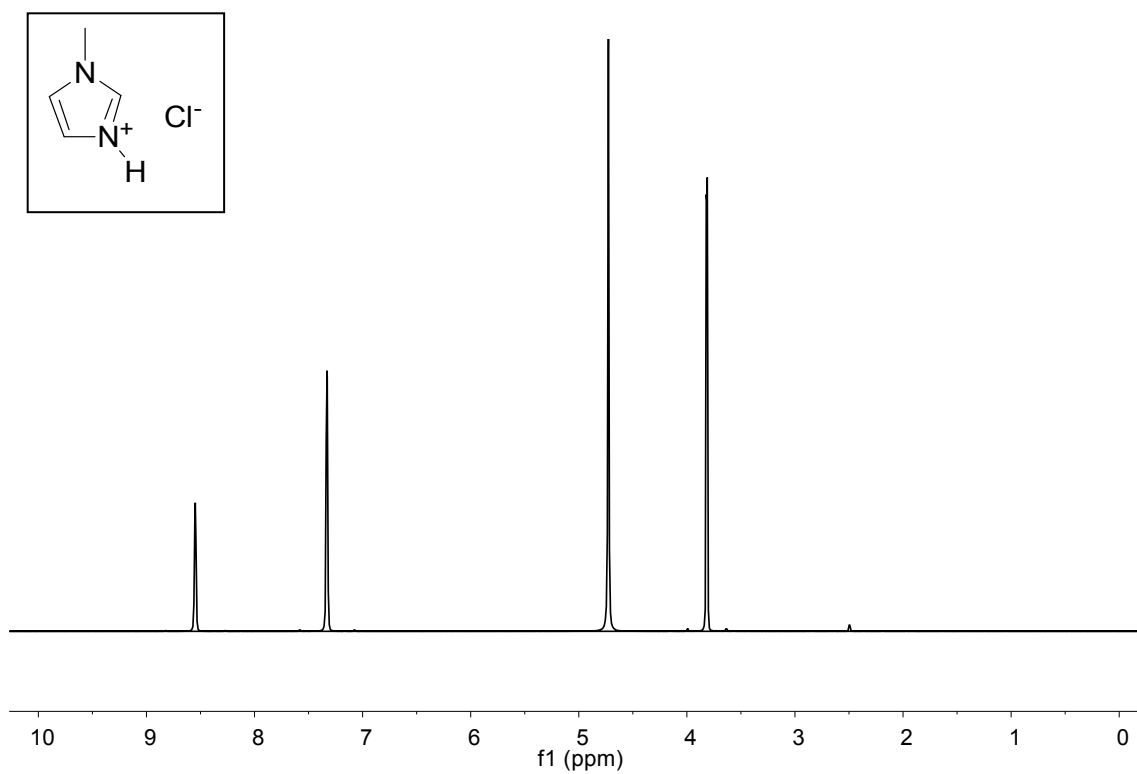

**Fig S3.** <sup>1</sup>H NMR (400 MHz, D<sub>2</sub>O) spectrum of [Hmim][Cl]:  $\delta$  8.59 (s, 1H, imidazolyl-H), 7.37 (s, 2H, imidazolyl-H), 3.85 (s, 3H, CH<sub>3</sub>).

Anal. Calcd. for C<sub>4</sub>H<sub>7</sub>N<sub>2</sub>Cl: C 40.52; H 5.95; N 23.63. Found: C 40.53; H 5.97; N 23.61.

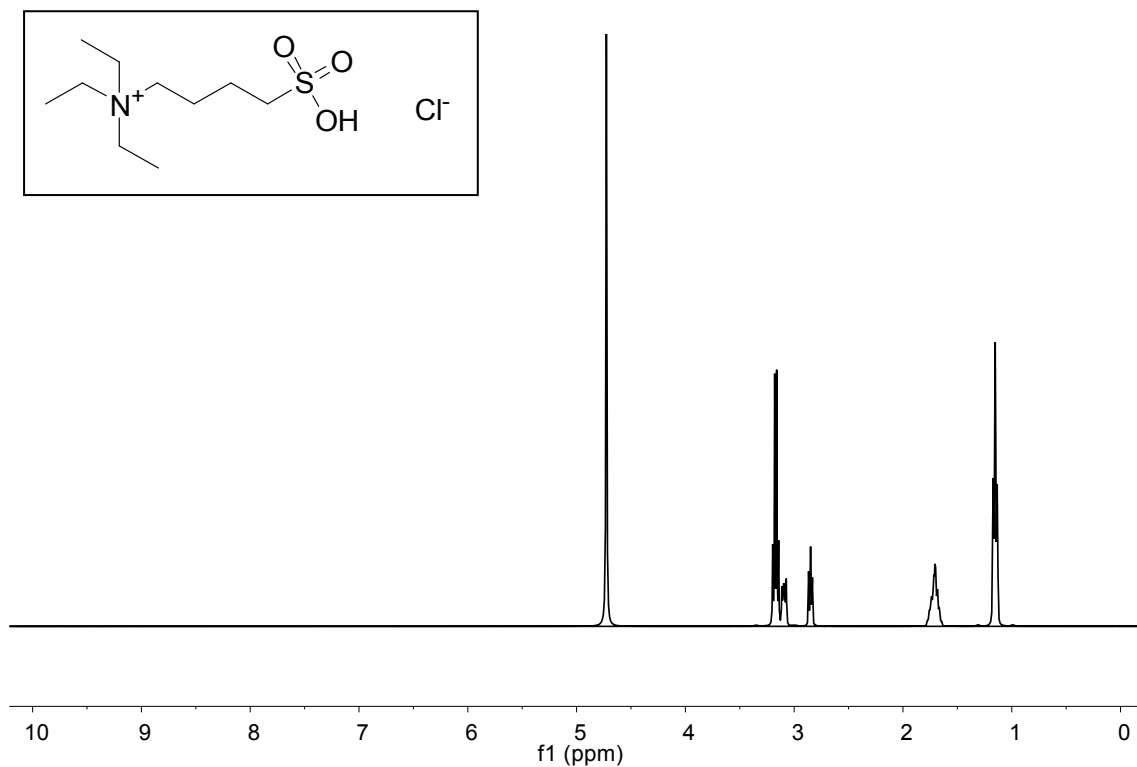

**Fig S4.**  $^1\text{H}$  NMR (400 MHz,  $\text{D}_2\text{O}$ ) spectrum of  $[\text{HSO}_3\text{-b-N-(C}_2\text{H}_5)_3][\text{Cl}]$ :  $\delta$  3.17 (q,  $J = 7.2$  Hz, 6H,  $\text{CH}_2$ ), 3.10 (t,  $J = 9.2$  Hz, 2H,  $\text{CH}_2$ ), 2.85 (t,  $J = 6.8$  Hz, 2H,  $\text{CH}_2$ ), 1.74-1.61 (m, 4H,  $\text{CH}_2$ ), 1.15 (t,  $J = 7.2$  Hz, 9H,  $\text{CH}_3$ ).

Anal. Calcd. for  $\text{C}_{10}\text{H}_{24}\text{NO}_3\text{S}\text{Cl}$ : C 43.86; H 8.83; N 5.12; S 11.71. Found: C 43.84; H 8.82; N 5.15; S 11.69.

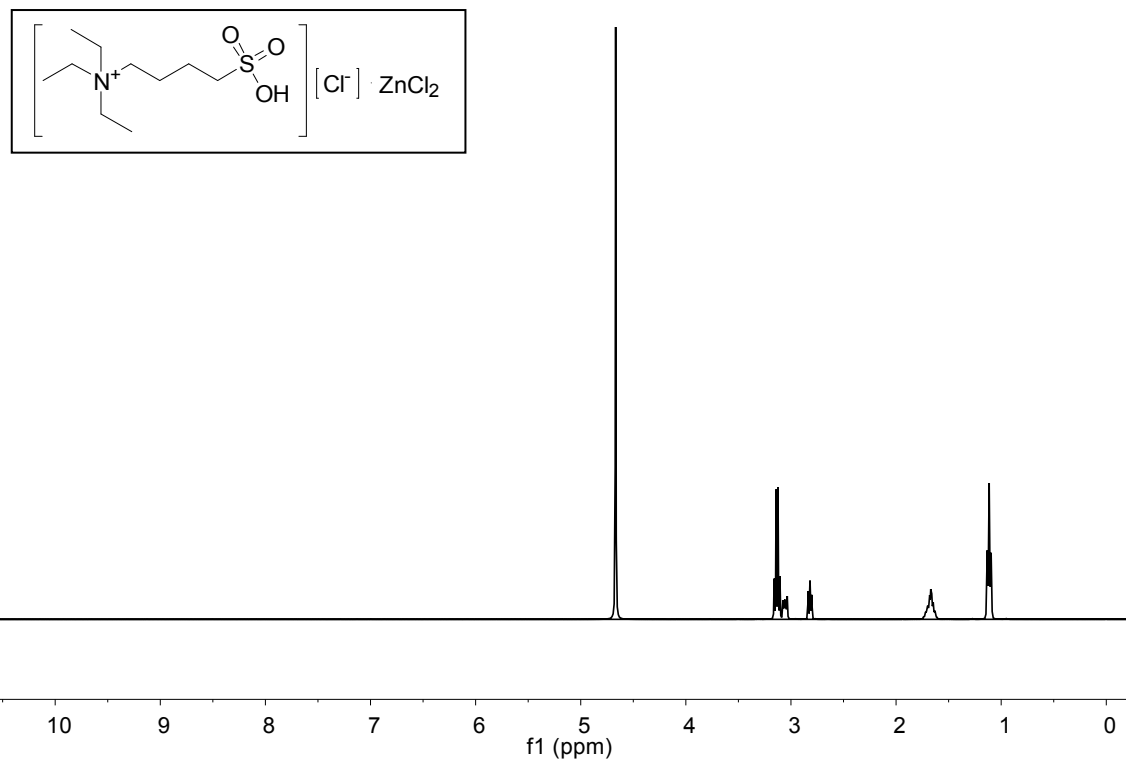

**Fig S5.**  $^1\text{H}$  NMR (400 MHz,  $\text{D}_2\text{O}$ ) spectrum of  $[\text{HSO}_3\text{-b-N-(C}_2\text{H}_5)_3][\text{Cl}]\cdot\text{ZnCl}_2$ :  $\delta$  3.13 (q,  $J = 7.2$  Hz, 6H,  $\text{CH}_2$ ), 3.06 (t,  $J = 9.2$  Hz, 2H,  $\text{CH}_2$ ), 2.82 (t,  $J = 6.8$  Hz, 2H,  $\text{CH}_2$ ), 1.74-1.61 (m, 4H,  $\text{CH}_2$ ), 1.11 (t,  $J = 7.2$  Hz, 9H,  $\text{CH}_3$ ).

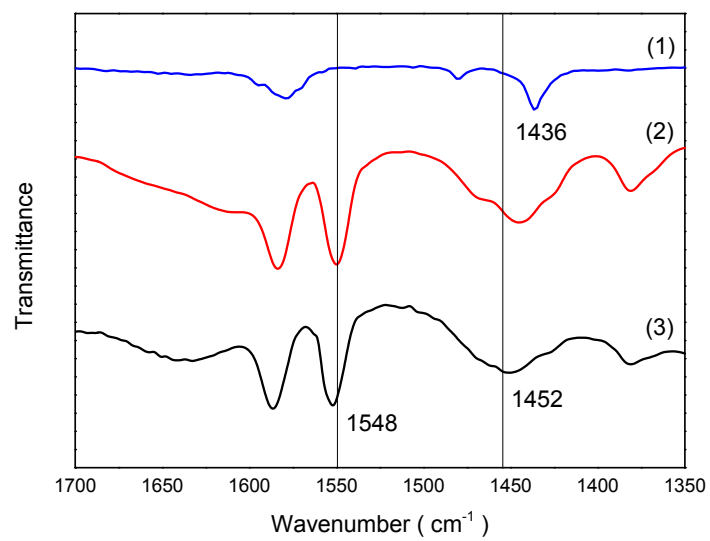

**Fig S6.** FT-IR spectra of samples using pyridine as probe. (1) Pure pyridine; (2) Pyridine/[Hmim][HSO<sub>4</sub>]- 0.5 FeCl<sub>2</sub>; (3) Pyridine/[Hmim][HSO<sub>4</sub>]- 0.7 FeCl<sub>2</sub>. Pyridine is 1/2 in volume.

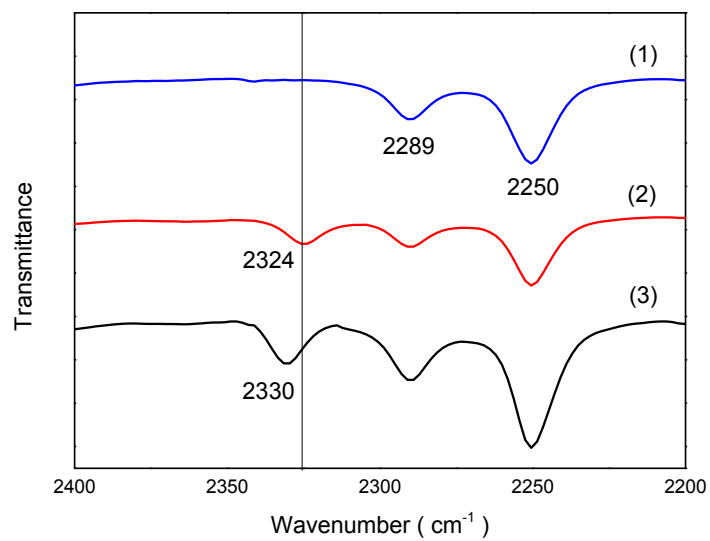

**Fig S7.** FT-IR spectra of samples using acetonitrile as probe. (1) Pure acetonitrile; (2) Acetonitrile/[Hmim][HSO<sub>4</sub>]- 0.5 FeCl<sub>2</sub>; (3) Acetonitrile/[Hmim][HSO<sub>4</sub>]- 0.7 FeCl<sub>2</sub>. Acetonitrile is 1/2 in volume.



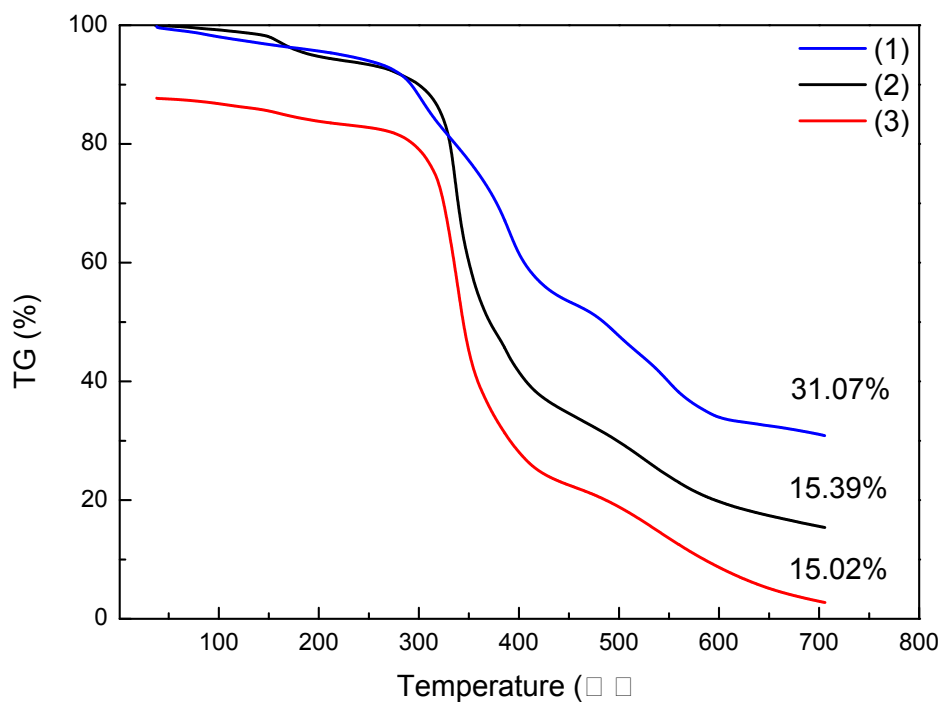

**Fig S8.** TGA curves of Brønsted-Lewis acidic ionic liquid. (1) [Hmim][HSO<sub>4</sub>]; (2) [Hmim][HSO<sub>4</sub>]- 0.5 FeCl<sub>2</sub>; (3) [Hmim][HSO<sub>4</sub>]- 0.7 FeCl<sub>2</sub>. (NOTE: The position of the [Hmim][HSO<sub>4</sub>]- 0.7 FeCl<sub>2</sub> isotherm is shifted.)
